# Supplementary material for: Influence Mechanism of Urban River Water Level on the Drainage Capacity of Stormwater Pipelines
Source: Research Square preprint supplement (doi:10.21203/rs.3.rs-8032958/v1), 2025-12-01
Supplement: Supplementary file 1 [file 493f0404eb6e34457c2b747d.pdf]

# Influence Mechanism of Urban River Water Level on the Drainage Capacity of Stormwater Pipelines

Jinjun Zhou<sup>1,2</sup>, Mengqi Kong<sup>2</sup>, Xiaoxin Zhang<sup>3,4</sup>, Zilong Liu<sup>4</sup>, Haijia Zhang<sup>2</sup>, Hao Wang<sup>2</sup>

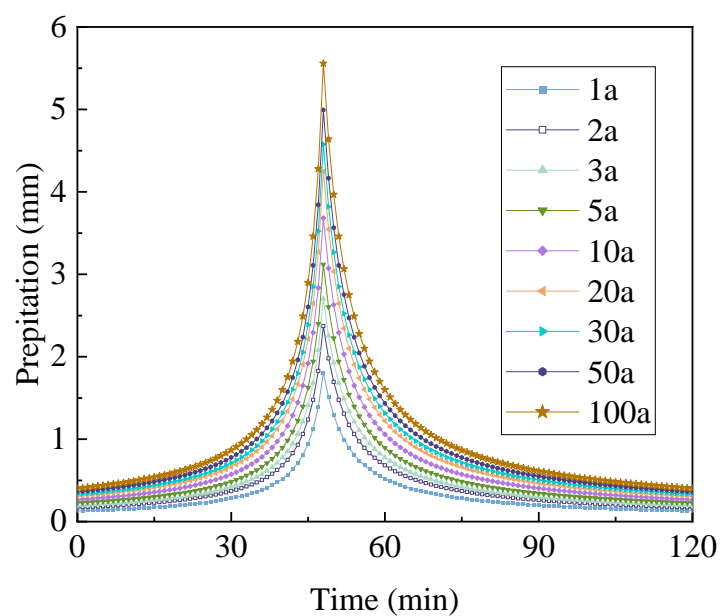

**Supplementary Figure S1:** Rainfall with Different Return Periods

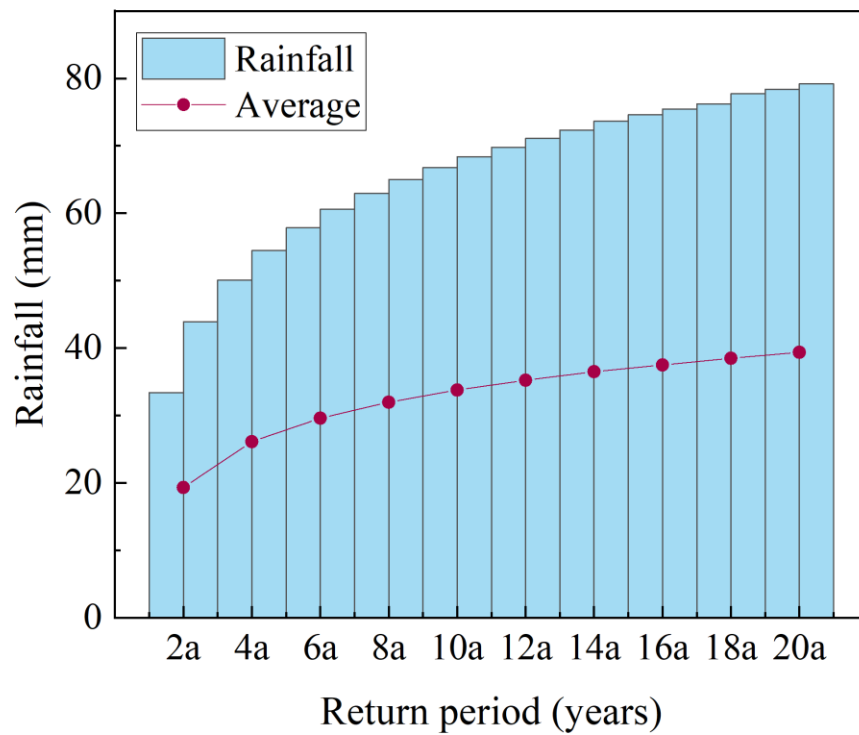

**Supplementary Figure S2: Rainfall Gradient Variation**

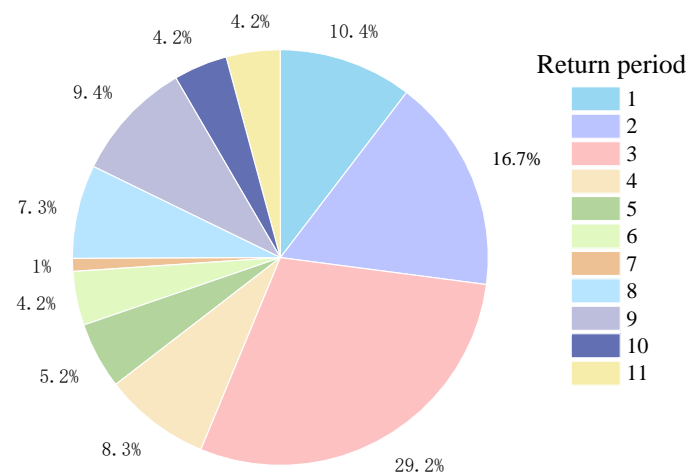

**Supplementary Figure S3: The Distribution of Maximum Flow Data**

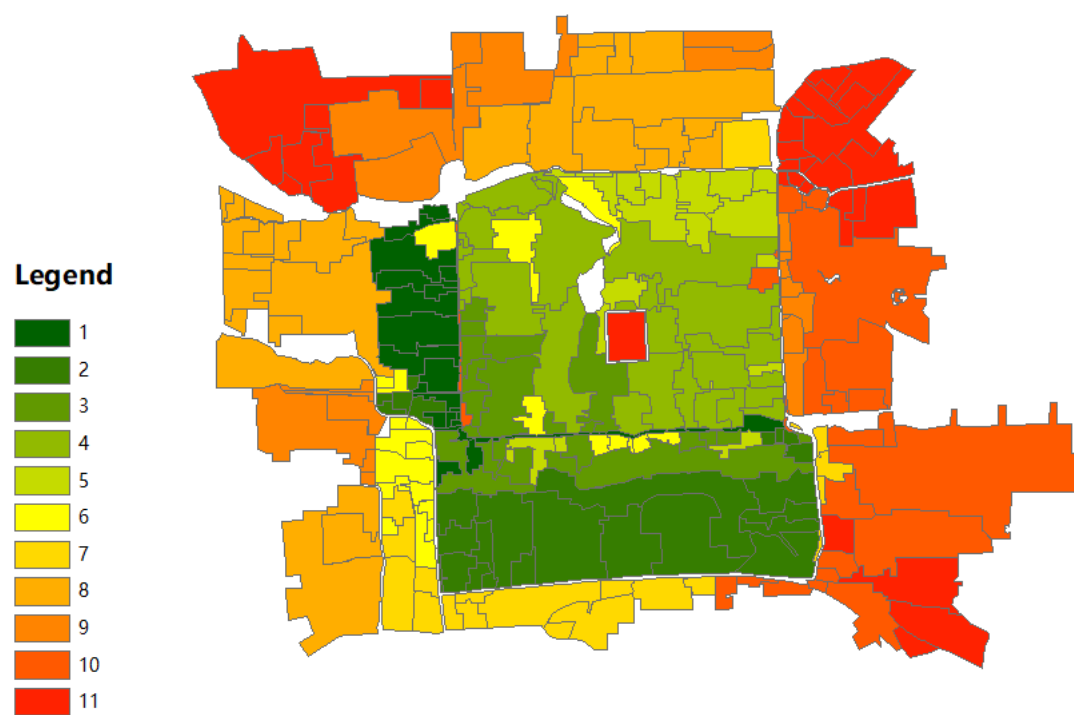

**Supplementary Figure S4:** The Distribution of Drainage Recurrence Period
